# Supplementary material for: Photoluminescence mechanism of carbon dots: triggering high-color-purity red fluorescence emission through edge amino protonation
Source: PubMed Central journal article supplement (PMC8616937; doi:10.1038/s41467-021-27071-4), 2021-11-25
Supplement: 41467_2021_27071_MOESM1_ESM.pdf [file 41467_2021_27071_MOESM1_ESM.pdf]

1 **Supplementary Information (SI)**

2

3 **Photoluminescence Mechanism of Carbon Dots: Triggering**  
4 **High-colour-purity Red Fluorescence Emission through edge**  
5 **amino protonation**

6

7 ***Qing Zhang<sup>1,2\*</sup>, Ruoyu Wang<sup>1</sup>, Bowen Feng<sup>1</sup>, Xiaoxia Zhong<sup>1\*</sup>, Kostya (Ken) Ostrikov<sup>3</sup>***

8

9 \_\_\_\_\_

10

11 <sup>1</sup>State Key Laboratory of Advanced Optical Communication Systems and Networks, Key  
12 Laboratory for Laser Plasmas (Ministry of Education), School of Physics and Astronomy,  
13 Shanghai Jiao Tong University, Shanghai 200240, China.

14

15

16 <sup>2</sup>Institute of Molecular Medicine, Renji Hospital, School of Medicine, Shanghai Jiao Tong  
17 University, Shanghai 200127, China.

18

19

20 <sup>3</sup>School of Chemistry and Physics and QUT Centre for Materials Science, Queensland  
21 University of Technology (QUT), Brisbane QLD 4000, Australia.

22

23 E-mail: qingzhang@sjtu.edu.cn; xxzhong@sjtu.edu.cn.

24

25

26

27 \_\_\_\_\_

28

29

30

31

32

33

34

35

36

37

38

39 **Table Caption:**

40 **Supplementary Table 1.** Comparison of photoluminescence red-shift mechanism of multi-color CDs  
41 between previous research and our work.

42 **Supplementary Table 2.** FL QYs of CDs, and 2,3-DAPN molecular.

43

44 **Figure Caption:**

45 **Supplementary Fig. 1** | Raman spectra of CDs

46 **Supplementary Fig. 2** | Zoomed  $^{13}\text{C}$ -NMR spectra of the CDs.

47 **Supplementary Fig. 3** | Zoomed  $^1\text{H}$ -NMR spectra of the CDs.

48 **Supplementary Fig. 4** |  $^{13}\text{C}$ -NMR spectra of 2,3-diaminophenazine (2,3-DAPN), Modified from  
49 “2,3-diaminophenazine is the product from the horseradish peroxidase-catalyzed oxidation of  
50 o-phenylenediamine” with permission from Elsevier.<sup>17</sup>

51 **Fig. 5** |  $^1\text{H}$ -NMR spectra of 2,3-DAPN, Modified from “2,3-diaminophenazine is the product from the  
52 horseradish peroxidase-catalyzed oxidation of o-phenylenediamine” with permission from Elsevier.<sup>17</sup>

53 **Supplementary Fig. 6** | (a)-(b) UV-vis absorption of OPD, 2,3-DAPN and CDs with or without  
54 protonation treatment.

55 **Supplementary Fig. 7** |(a), (b) FL spectra of protonated OPD kept at deionized water for 6 hours  
56 excited by 480 nm and 808 nm femtosecond laser. (c), (d)  $^1\text{H}$ -NMR and zoomed  $^1\text{H}$ -NMR spectra of  
57 OPD molecular kept at deionized water for 6 hours. Due to the oxidation reaction, part of OPD  
58 molecular has converted into 2,3-DAPN analogues.

59 **Supplementary Fig. 8** | (a), (b) UV-vis absorption of OPD with or without protonation treatment; (c),  
60 (d) FL emission of CDs, OPD and 2,3-DAPN samples with or without protonation treatment the  
61 identical excitation conditions.

62 **Supplementary Fig. 9** | (a), (c) Up-conversion FL spectra of 2,3-DAPN at pH7 and pH 1 under 808  
63 nm femtosecond laser excitation. (b), (d) Relationship of FL intensity and femtosecond (fs) laser  
64 power at pH 7 and pH 1.

65 **Supplementary Fig. 10** | (a), (c) Up-conversion FL spectra of OPD at pH7 and pH 1 under 808 nm  
66 femtosecond (fs) laser excitation. (b), (d) Relationship of FL intensity and fs laser power at pH 7 and  
67 pH 1.

68 **Supplementary Fig. 11** | (a), (b), and (c) Transmission electron microscopy imaging (TEM), high  
69 resolution image and Size distribution of CDs; (d), (g) UV-vis absorption spectra of CDs with or  
70 without protonation; (e), (h) FL spectra of CDs dissolved without protonation (excited at 400 nm) and  
71 with protonation (excited at 560 nm); (f), (i) FL excitation spectra of CDs with or without protonation.

72 **Supplementary Fig. 12** | (a)-(d) Raman spectra of CDs prepared at 60,120, 180 and 220°C. (e) and (f)  
73 FL emission of CDs synthesized with or without protonation.

74 **Supplementary Fig. 13** | (a) and (b) FL emission of the protonated CDs excited under 600 and 800 nm  
75 continuum light source; (c) and (d) NIR-II in vivo images of mice before and after vein injection.

76 **Supplementary Fig. 14** | (a) Photograph of LED device fabricated using CDs; (b) FL emission  
77 spectrum of the LED device excited by UV light-emitting chips; (c) Color coordinates picture of the  
78 LED device (0.26, 0.59).

79

80 **Section 1: Supplementary Information of Tables.**

81 **Supplementary Table 1.** Comparison of photoluminescence red-shift mechanism of multi-color CDs  
 82 between previous research and our work.

83

| Reference       | Journal                                | Mechanism of PL red-shift                                             |
|-----------------|----------------------------------------|-----------------------------------------------------------------------|
| 1 <sup>1</sup>  | Carbon 2014, 70, 279.                  | Increasing degree of COO <sup>-</sup>                                 |
| 2 <sup>2</sup>  | Advanced Materials 2015, 27, 1663      | Increasing degree of oxidation                                        |
| 3 <sup>3</sup>  | Angew. Chem. - Int. Ed. 2015, 54, 2970 | Increasing degree C-O-C & C-O                                         |
| 4 <sup>4</sup>  | Acs Nano 2016, 10, 484                 | Increasing degree of COO <sup>-</sup>                                 |
| 5 <sup>5</sup>  | Nanoscale 2016, 8, 729                 | Increasing degree of N content                                        |
| 6 <sup>6</sup>  | ACS Nano 2017, 11, 12402.              | Increasing degree of graphitic-N                                      |
| 7 <sup>7</sup>  | Green Chem. 2017, 19, 3611.            | Increasing degree of oxidation                                        |
| 8 <sup>8</sup>  | Advanced Materials, 2018, 30.          | Increasing degree of graphitization and surface modification of -COOH |
| <b>Our work</b> |                                        | <b>Protonation of 2,3-Diaminophenazine</b>                            |

84

85

86 **Supplementary Table 2.** FL QYs of CDs, and 2,3-DAPN molecular.

87

| QYs                 | CDs  | 2,3-DAPN |
|---------------------|------|----------|
| Without protonation | 14%  | 24%      |
| With protonation    | 1.9% | 0.2%     |

88

89

90 **Supplementary Table 3.** FL QYs of CDs, and 2,3-DAPN molecular.

91

| Reference | NIR Organic dye          | QYs (%)             |
|-----------|--------------------------|---------------------|
| 1         | IR-1061 (Commercial dye) | 1.7% <sup>9</sup>   |
| 2         | LZ1105                   | 1.6% <sup>10</sup>  |
| 2         | IR-E1                    | 0.7% <sup>11</sup>  |
| 3         | IR-FTP                   | 0.02% <sup>12</sup> |
| 4         | IR-FTTP                  | 0.1% <sup>13</sup>  |
| 5         | CH1055-PEG               | 0.3% <sup>14</sup>  |
| 6         | CH-4T                    | 1.1% <sup>15</sup>  |
| 7         | SCH1100                  | 0.2% <sup>16</sup>  |

92

93

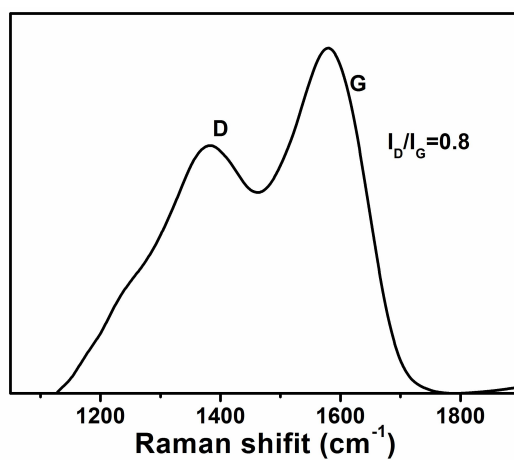

**Supplementary Fig. 1** Raman spectra of CDs.

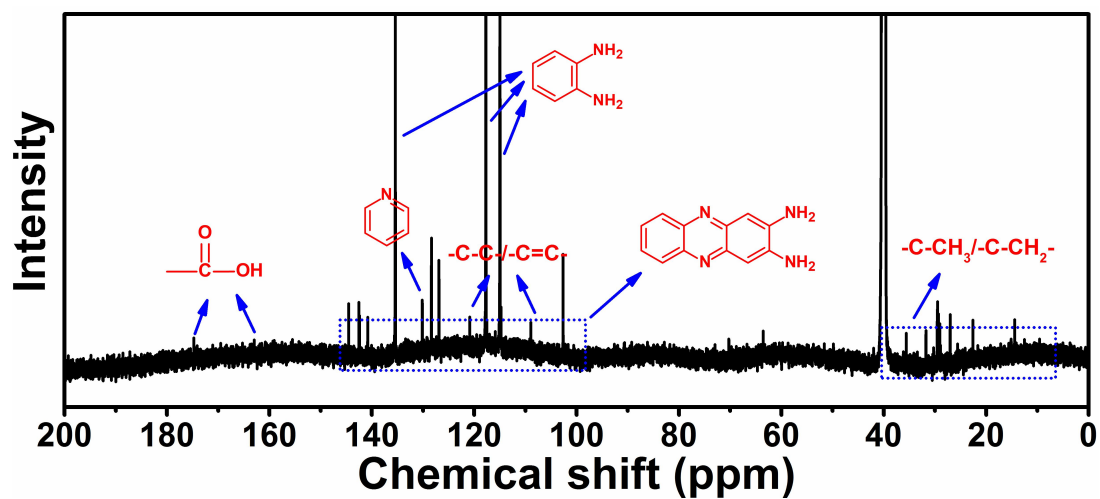

Supplementary Fig. 2 | Zoomed <sup>13</sup>C-NMR spectra of the CDs.

119  
120  
121  
122  
123  
124  
125  
126  
127  
128  
129  
130  
131  
132  
133  
134  
135  
136  
137  
138  
139  
140  
141  
142  
143  
144

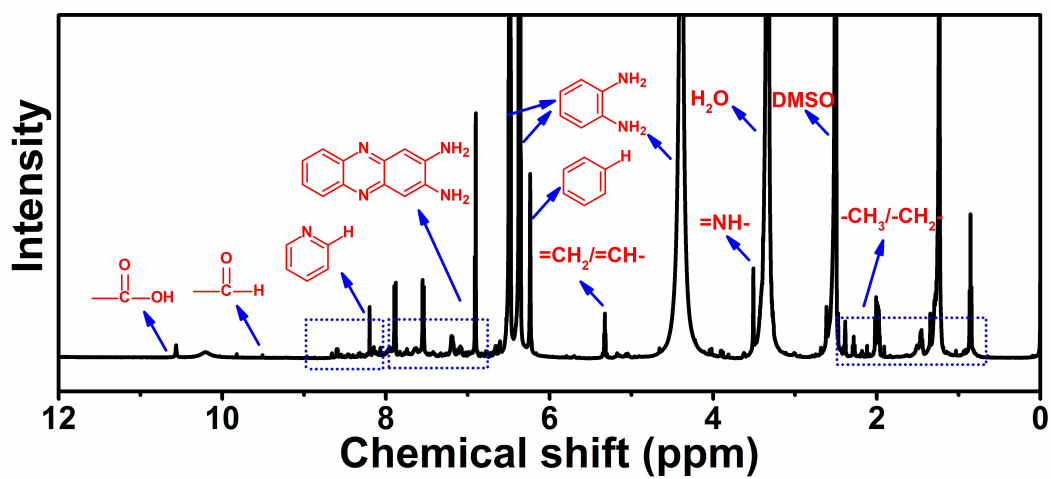

Supplementary Fig. 3| Zoomed <sup>1</sup>H-NMR spectra of the CDs.

145  
 146  
 147  
 148  
 149  
 150  
 151  
 152  
 153  
 154  
 155  
 156  
 157  
 158  
 159  
 160  
 161  
 162  
 163  
 164  
 165  
 166  
 167  
 168  
 169  
 170  
 171  
 172

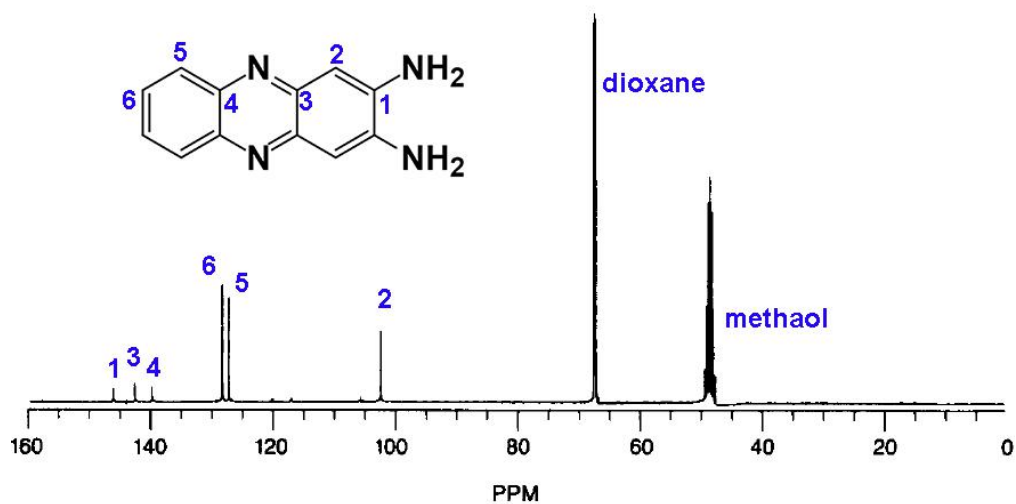

173  
 174  
 175  
 176  
 177  
 178  
 179  
 180  
 181  
 182  
 183  
 184  
 185  
 186  
 187  
 188  
 189  
 190  
 191  
 192  
 193  
 194  
 195  
 196  
 197  
 198  
 199  
 200  
 201  
 202  
 203  
 204  
 205

**Supplementary Fig. 4** | <sup>13</sup>C-NMR spectra of 2,3-diaminophenazine (2,3-DAPN), Modified from “2,3-diaminophenazine is the product from the horseradish peroxidase-catalyzed oxidation of o-phenylenediamine” with permission from Elsevier <sup>17</sup>.

206

207

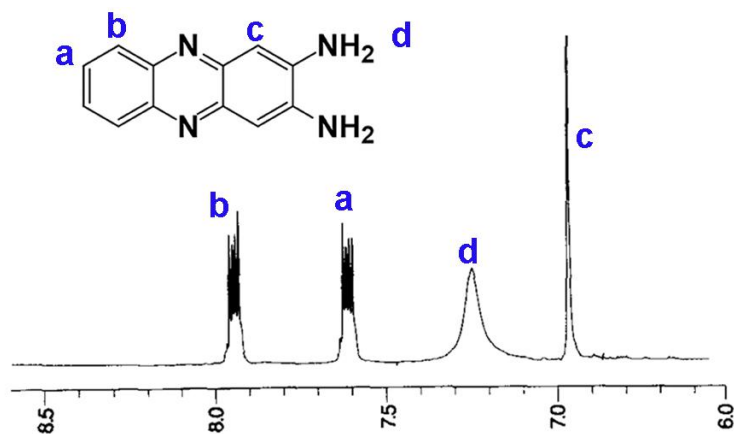

208

209

**Supplementary Fig. 5** | <sup>1</sup>H-NMR spectra of 2,3-DAPN, Modified from “2,3-diaminophenazine is the product from the horseradish peroxidase-catalyzed oxidation of o-phenylenediamine” with permission from Elsevier<sup>17</sup>.

213

214

215

216

217

218

219

220

221

222

223

224

225

226

227

228

229

230

231

232

233

234

235

236

237

238

239

240



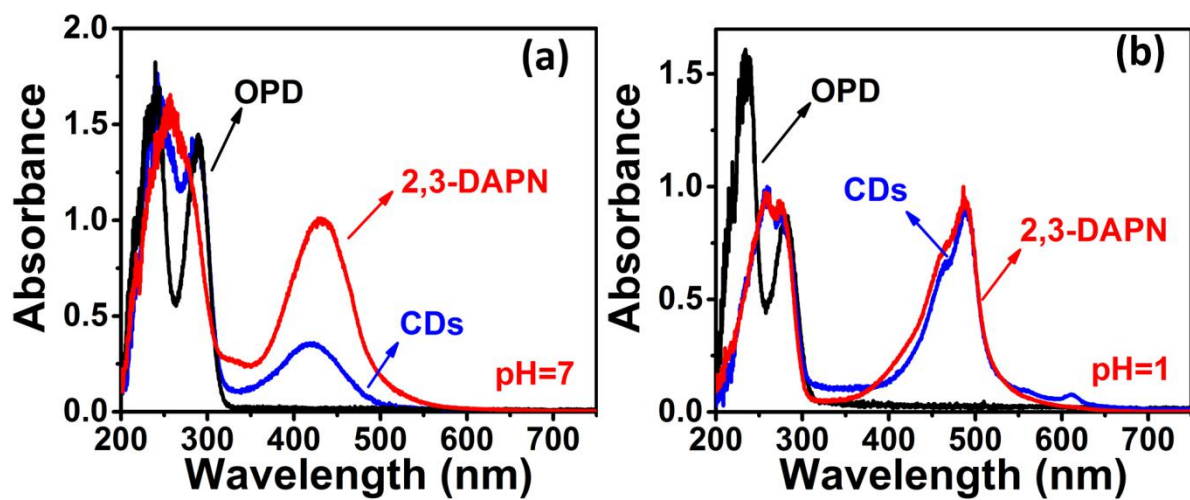

241  
242

243 **Supplementary Fig. 6** | (a)-(b) UV-vis absorption of OPD, 2,3-DAPN and CDs with or without  
244 protonation treatment.

245  
246  
247  
248  
249  
250  
251  
252  
253  
254  
255  
256  
257  
258  
259  
260  
261  
262  
263  
264  
265  
266  
267  
268  
269  
270  
271  
272

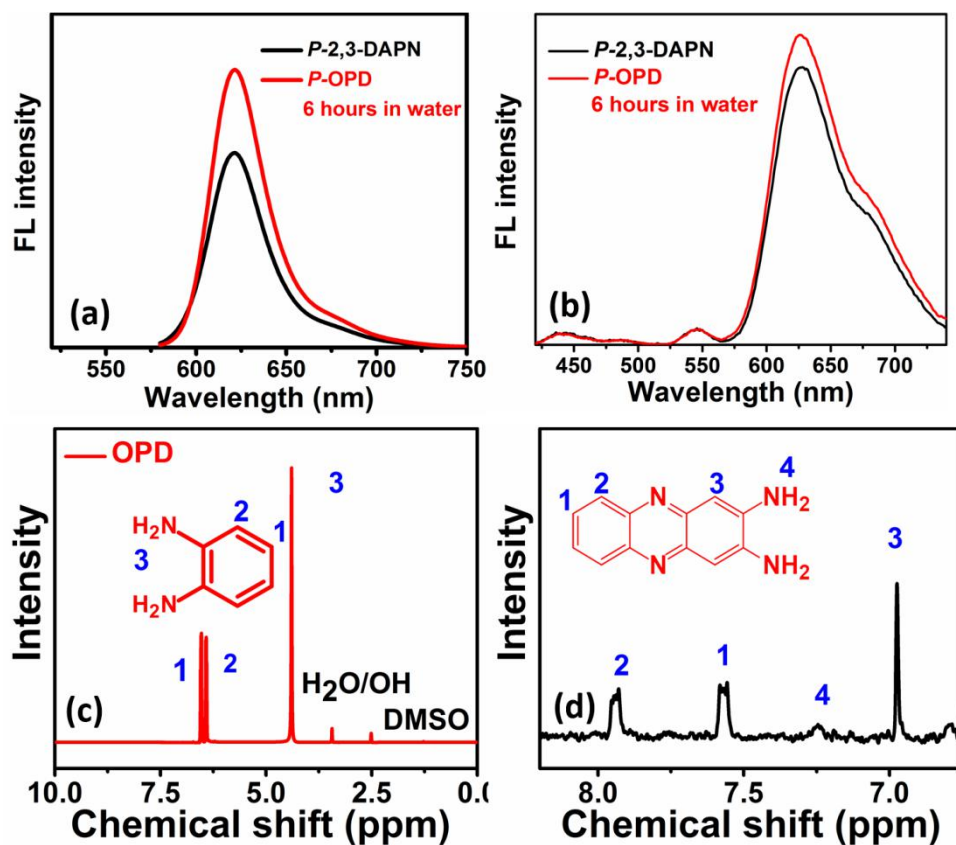

273

274

275 **Supplementary Fig. 7** | (a), (b) FL spectra of the protonated OPD kept in deionized water for 6 hours  
 276 excited by 480 nm and 808 nm femtosecond laser. (c), (d) <sup>1</sup>H-NMR and magnified <sup>1</sup>H-NMR spectra of  
 277 the OPD molecular kept in deionized water for 6 hours. Due to the oxidation reaction, a part of the  
 278 OPD molecular has converted into 2,3-DAPN analogues.

279

280

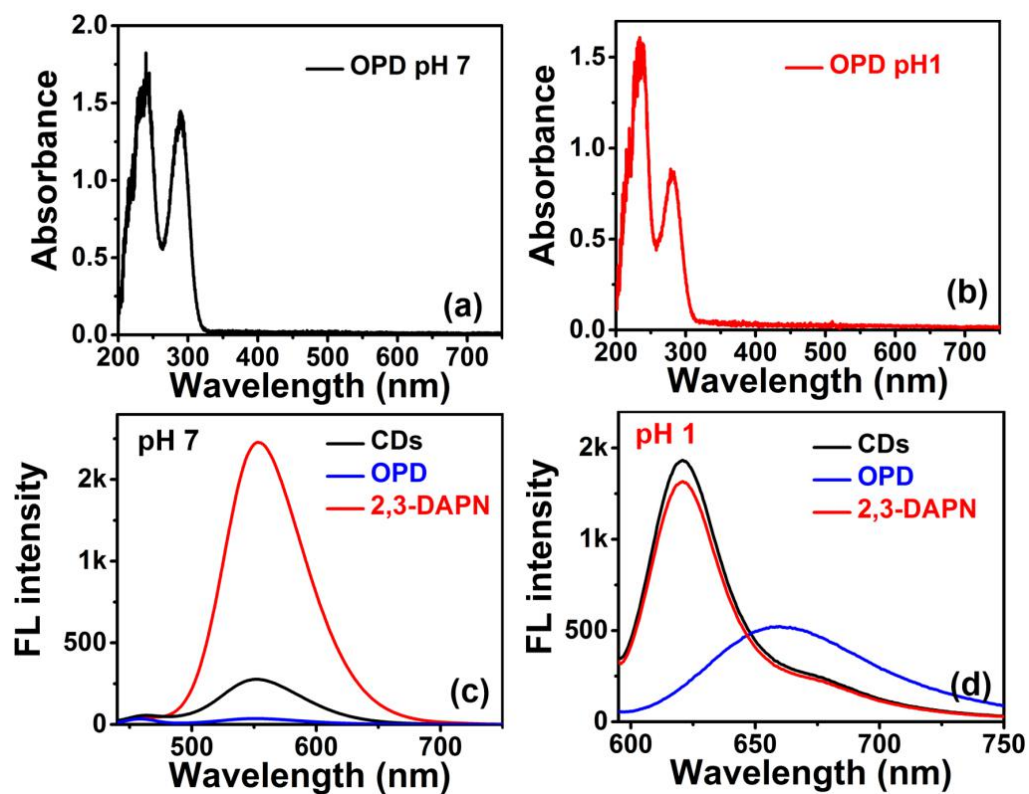

281  
282

283 **Supplementary Fig. 8** | (a), (b) UV-vis absorption of OPD with or without protonation treatment; (c),  
284 (d) FL emission of CDs, OPD and 2,3-DAPN samples with or without protonation treatment the  
285 identical excitation conditions.

286

287

288

289

290

291

292

293

294

295

296

297

298

299

300

301

302

303

304

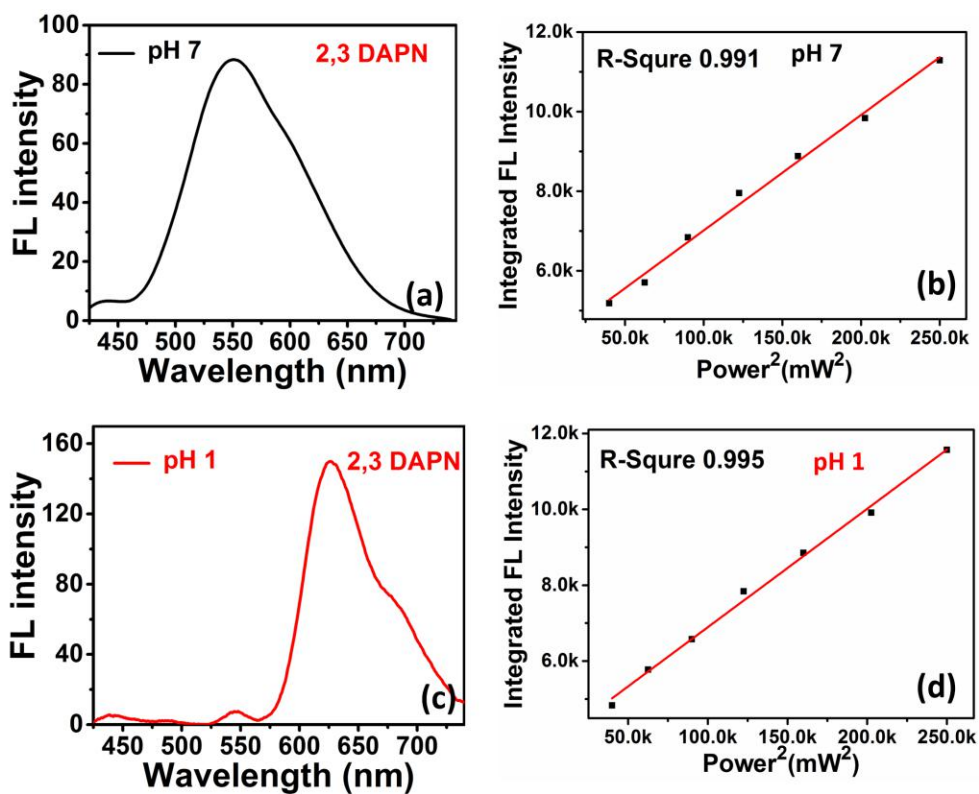

305

306

307 **Supplementary Fig. 9** | (a), (c) Up-conversion FL spectra of 2,3-DAPN at pH7 and pH 1 under 808  
 308 nm femtosecond laser excitation. (b), (d) Relationship of FL intensity and femtosecond (fs) laser  
 309 power at pH 7 and pH 1.

310

311

312

313

314

315

316

317

318

319

320

321

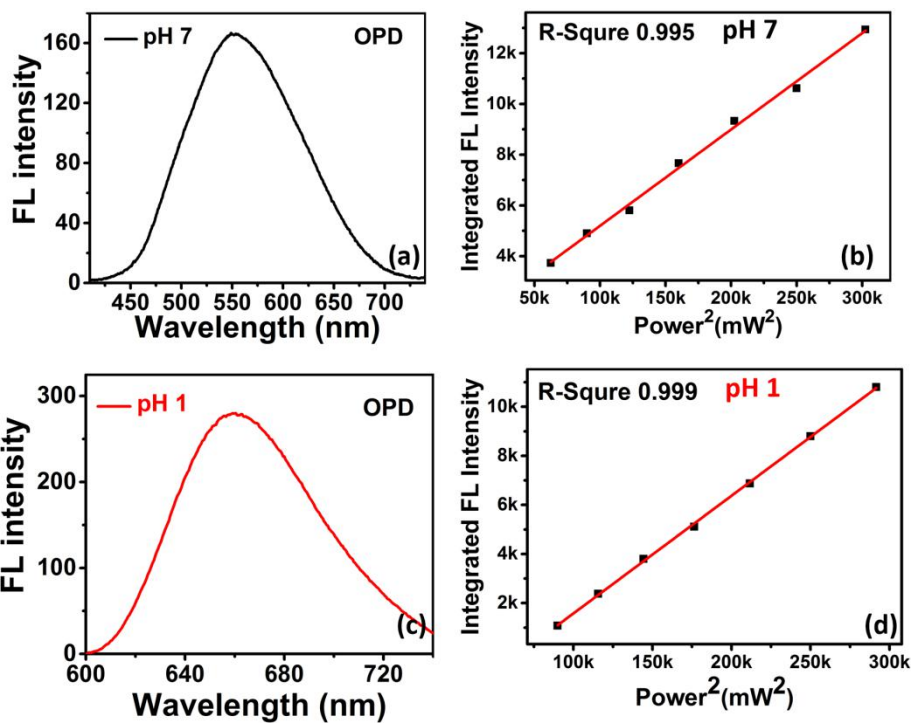

322

323

324 **Supplementary Fig. 10** | (a), (c) Up-conversion FL spectra of OPD at pH7 and pH 1 under 808 nm  
 325 femtosecond (fs) laser excitation. (b), (d) Relationship of FL intensity and fs laser power at pH 7 and  
 326 pH 1.

327

328

329

330

331

332

333

334

335

336

337

338

339

340

341

342

343

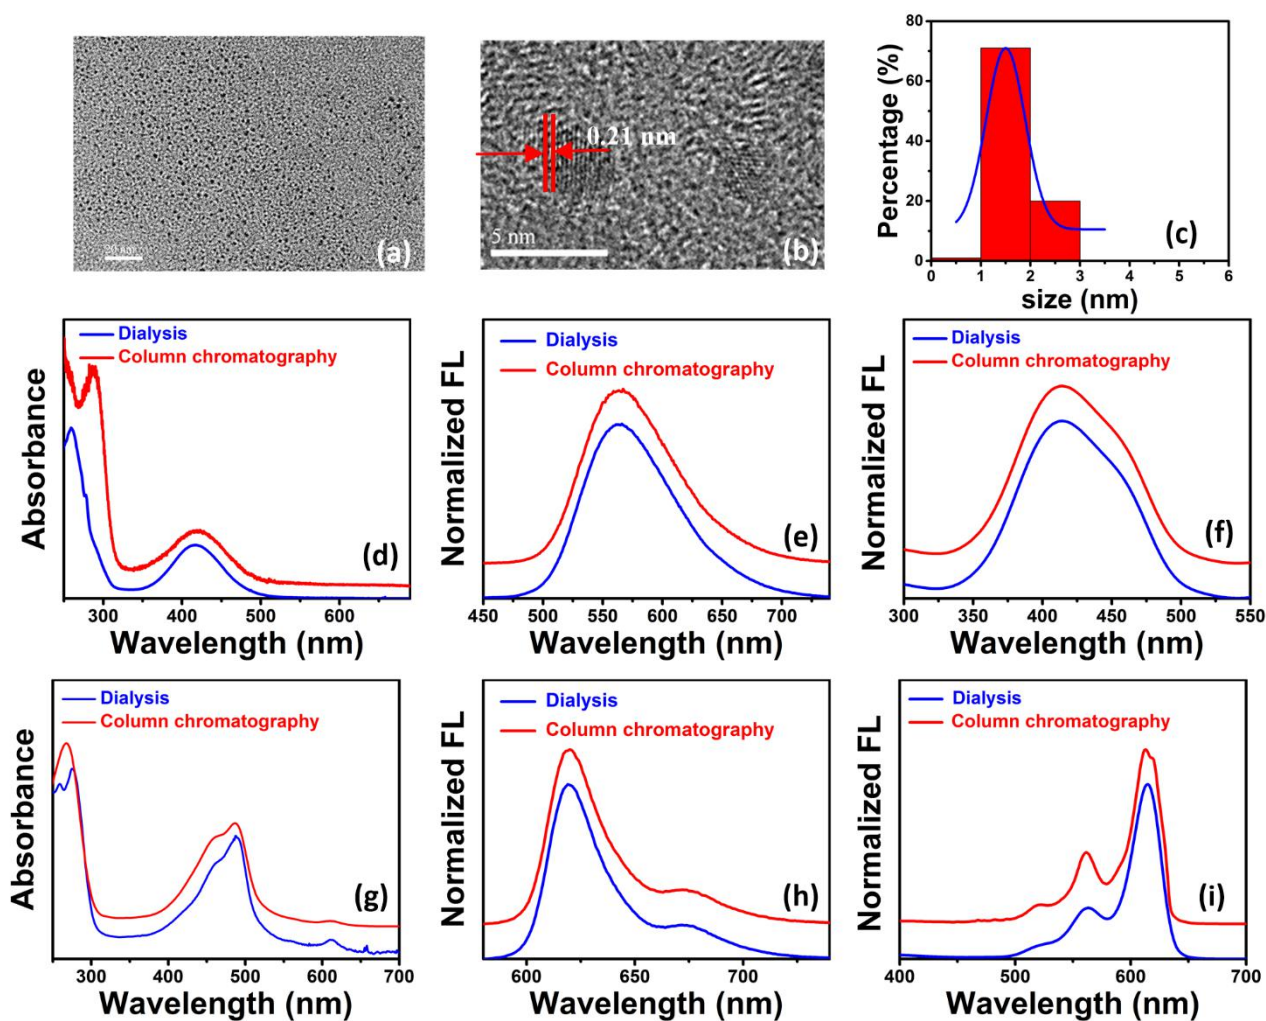

344  
 345  
 346  
 347  
 348  
 349  
 350  
 351  
 352  
 353

**Supplementary Fig. 11** | (a), (b), and (c) Transmission electron microscopy imaging (TEM), high resolution image and size distribution of CDs; (d), (g) UV-vis absorption spectra of CDs with or without the protonation; (e), (h) FL spectra of CDs dissolved without the protonation (excited at 400 nm) and with the protonation (excited at 560 nm); (f), (i) FL excitation spectra of CDs with or without the protonation.

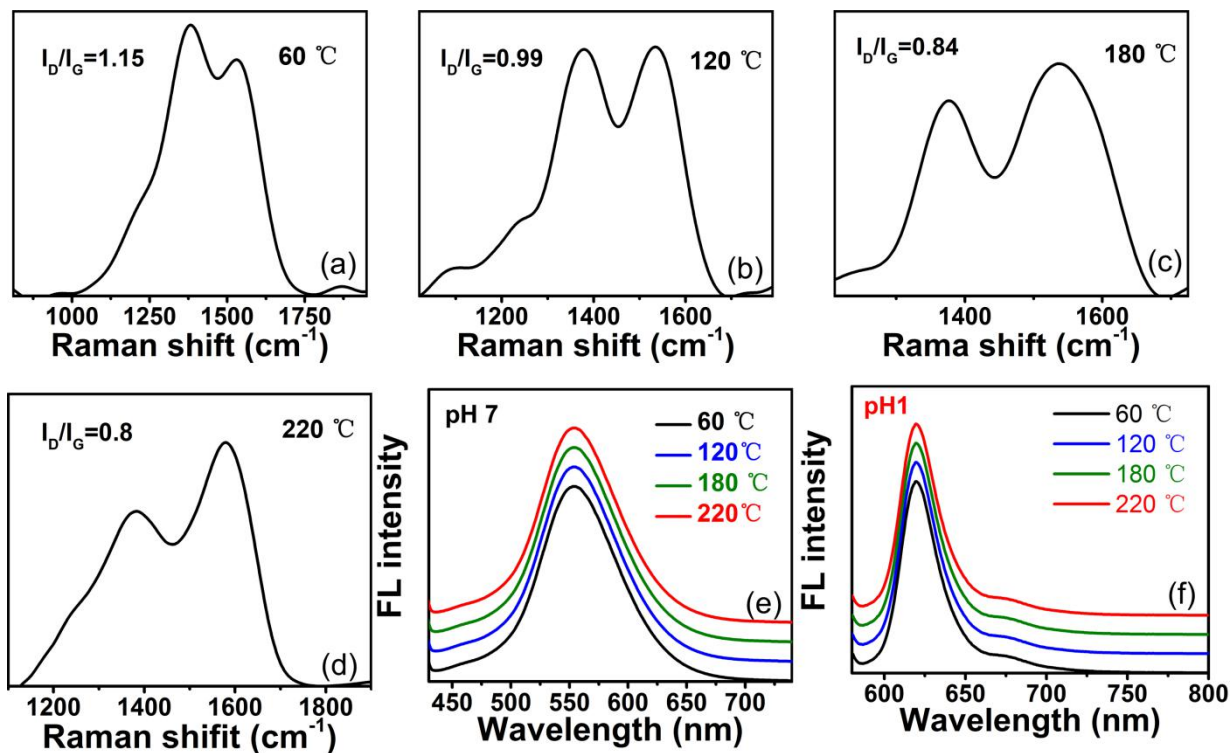

354

355

356 **Supplementary Fig. 12** | (a)-(d) Raman spectra of CDs prepared at 60,120, 180 and 220 °C. (e) and (f)  
 357 FL emission of CDs synthesized with or without protonation.

358

359

360

361

362

363

364

365

366

367

368

369

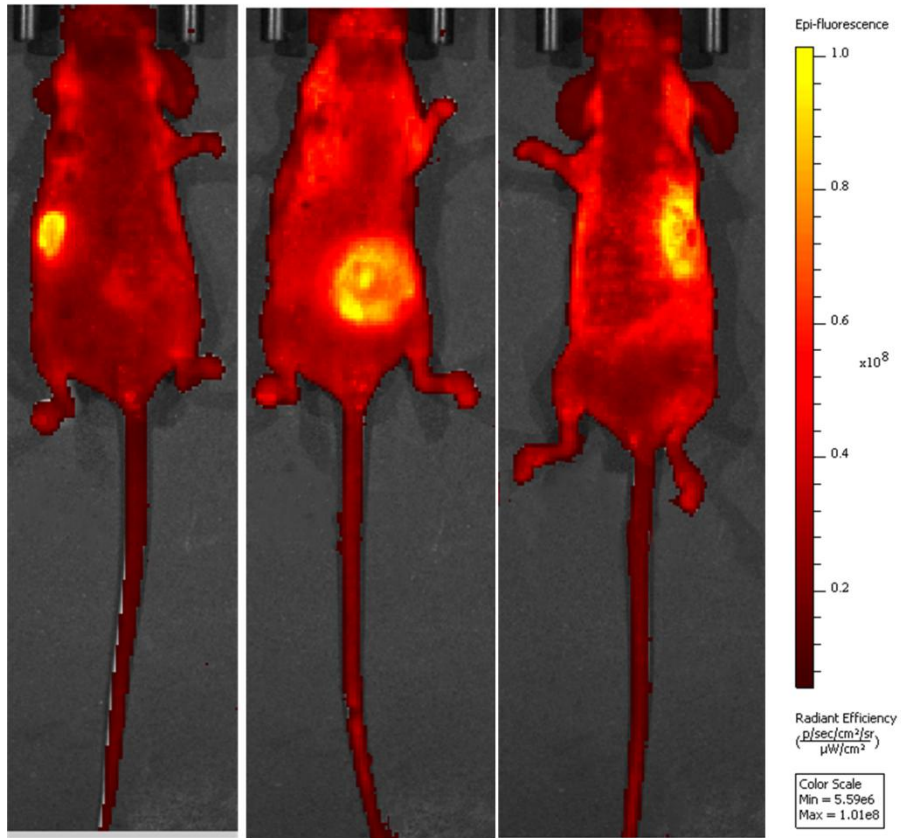

370

371

372 **Supplementary Fig. 13** | In vivo fluorescence images of nude mice injected with different  
373 subcutaneous location.

374

375



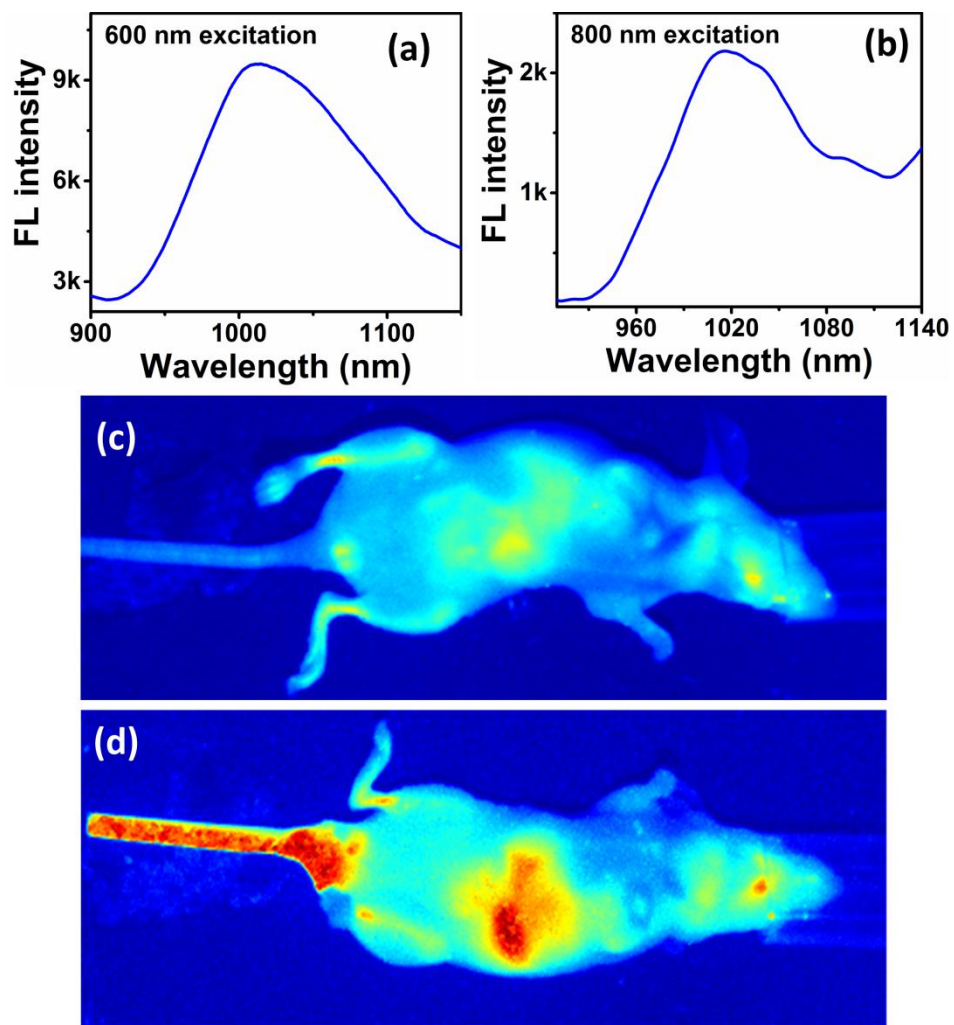

376

377

378 **Supplementary Fig. 14** | (a) and (b) FL emission of the protonated CDs excited under 600 and 800 nm  
379 continuum light source; (c) and (d) NIR-II in vivo images of mice before and after vein injection.

380

381

382

383

384

385

386

387

388

389

390

391

392 **Reference**

- 393 1. Hola K, *et al.* Photoluminescence effects of graphitic core size and surface functional groups in carbon dots: COO-  
394 induced red-shift emission. *Carbon* **70**, 279-286 (2014).
- 395 2. Bao L, Liu C, Zhang ZL, Pang DW. Photoluminescence-Tunable Carbon Nanodots: Surface-State Energy-Gap Tuning.  
396 *Adv Mater* **27**, 1663-+ (2015).
- 397 3. Hu SL, Trinchì A, Atkin P, Cole I. Tunable Photoluminescence Across the Entire Visible Spectrum from Carbon Dots  
398 Excited by White Light. *Angew Chem-Int Edit* **54**, 2970-2974 (2015).
- 399 4. Ding H, Yu S-B, Wei J-S, Xiong H-M. Full-Color Light-Emitting Carbon Dots with a Surface-State-Controlled  
400 Luminescence Mechanism. *Acs Nano* **10**, 484-491 (2016).
- 401 5. Guo L, *et al.* Tunable Multicolor Carbon Dots Prepared from Well-defined Polythiophene Derivatives and their  
402 Emission Mechanism. **8**, 729 (2015).
- 403 6. Hola K, *et al.* Graphitic Nitrogen Triggers Red Fluorescence in Carbon Dots. **11**, 12402-12410 (2017).
- 404 7. Liu ML, Yang L, Li R, Chen BB, Liu H, Huang CZ. Large-scale simultaneous synthesis of highly photoluminescent  
405 green amorphous carbon nanodots and yellow crystalline graphene quantum dots at room temperature. **19**,  
406 10.1039.C1037GC01236E (2017).
- 407 8. Miao X, *et al.* Synthesis of Carbon Dots with Multiple Color Emission by Controlled Graphitization and Surface  
408 Functionalization. *Adv Mater* **30**, (2018).
- 409 9. Tao Z, *et al.* Biological Imaging Using Nanoparticles of Small Organic Molecules with Fluorescence Emission at  
410 Wavelengths Longer than 1000 nm. *Angew Chem*, e201307346 (2013).
- 411 10. Li BH, *et al.* Organic NIR-II molecule with long blood half-life for in vivo dynamic vascular imaging. *Nat Commun* **11**,  
412 (2020).
- 413 11. Zhang XD, *et al.* Traumatic Brain Injury Imaging in the Second Near-Infrared Window with a Molecular Fluorophore.  
414 *Adv Mater*, 6872-6879 (2016).
- 415 12. Yang, *et al.* Rational Design of Molecular Fluorophores for Biological Imaging in the NIR-II Window. *Adv Mater*,  
416 e1605497.
- 417 13. Yang Q, Hu Z, Zhu S, Rui M, Dai H. Donor Engineering for NIR-II Molecular Fluorophores with Enhanced  
418 Fluorescent Performance. *J Am Chem Soc* **140**, 1715-1724 (2018).
- 419 14. Antaris AL, *et al.* A small-molecule dye for NIR-II imaging. *Nat Mater*, 235-242 (2016).
- 420 15. Antaris AL, *et al.* A high quantum yield molecule-protein complex fluorophore for near-infrared II imaging. *Nat*  
421 *Commun* **8**, 15269 (2017).
- 422 16. Novel benzo-bis(1,2,5-thiadiazole) fluorophores for in vivo NIR-II imaging of cancer. *Chem Sci*, 6203-6207 (2016).
- 423 17. Tarcha PJ, Chu VP, Whittern D. 2,3-diaminophenazine is the product from the horseradish peroxidase-catalyzed  
424 oxidation of o-phenylenediamine. *Anal Biochem* **165**, 230-233.
- 425
- 426
